# Supplementary material
Source: HighWire-hosted journal article supplement (http://www.qdcxjkg.com/highwire/filestream/128862/field_highwire_adjunct_files/0/ERJ-01551-2015_Supplement.pdf)
Supplement: ERJ-01551-2015_Supplement.pdf [file ERJ-01551-2015_Supplement.pdf]

## Online Supplementary file

### PICADAR- a screening tool for primary ciliary dyskinesia

Laura Behan, Borislav D Dimitrov, Claudia Kuehni, Claire Hogg, Myrofora Goutaki, Mary Carroll, H J Evans, Amanda Harris, Samantha Packham, Woolf T Walker, Jane S Lucas

#### e-Appendix 1.

##### The development and validation of PICADAR+S

For patients with at least 1 sibling (irrespective of PCD diagnosis in the sibling), an alternative scoring tool, PICADAR+S was developed.

By means of the same methods used to develop PICADAR, 28 potential predictors (including siblings with PCD, yes/no) were entered into the model individually using stepwise logistic regression. This model retained 8 significant predictors which were in order of importance; siblings with PCD, situs inversus, full term gestation, SCBU, cardiac defect, rhinitis, neonatal chest symptoms, and ears & hearing symptoms (Table E4). The accuracy of the best model was 92% and sensitivity and specificity was 75% and 96% respectively. Good agreement was also shown through the Hosmer-Lemeshow test ( $p=0.33$ ). From the final prediction model, a simplified practical prediction tool, PICADAR+S, was developed to assess the probability that a patient with a sibling had PCD. ROC analysis showed good discriminant ability for the model (AUC= 0.94; CI 0.90-0.97) and the predicative tool (AUC=0.94; CI 0.90-0.97) (Figure E2).

The maximum score is 20 with individual predictors having integer scores of 1 to 5 (Figure E3). A score of 20 corresponded to a 100% probability of having PCD (Table E5). Sensitivity and specificity was 0.93 and 0.75 for a score of 6 points and 0.15 and 1.00 for a score of 14 (Table E6). This provided cut-off values for likelihood of PCD where a score of  $\leq 6$ ,  $\geq 7 \leq 13$ ,  $\geq 14$ . In the derivative PCD+ group, 10.7% had a score  $\leq 6$ , 41.1% had a score  $\geq 7 \leq 13$ , and 48.2%

had a score  $\geq 14$ . The percentage in each group for the PCD- group was 72.3% with a score  $\leq 6$ , 27.7% with a score  $\geq 7 \leq 13$ , and 0.0% had a score  $\geq 14$  (Table E7).

The application of the PICADAR+S rule in the validation group ranged from 0 to 19 ( $9.4 \pm 4.9$ ) was tested on 56 positive and 47 negative referrals. Again there was a significant difference between the mean PICADAR+S scores in the diagnostic outcome groups (PCD+  $12.7 \pm 3.9$ ; PCD-  $5.6 \pm 2.6$ ;  $P < 0.001$ ). Good discriminant ability was maintained when used in the validation group with an AUC of 0.93 (95% CI, 0.88- 0.97) (Figure E4). For this population, 16.0% of PCD+ had a score  $\leq 6$ , 16.0% had a score  $\geq 7 \leq 13$  and 67.1% had a score  $\geq 14$ . The percentage of PCD- in each group was 76.6% with a score  $\leq 6$ , 21.3% with a score  $\geq 7 \leq 13$ , and 2.1% with a score  $\geq 14$  (Table E7).

## Supplementary figures

Figure E1: Histograms showing distributions of scores for A. PICADAR for PCD+ and B.

PICADAR for PCD-in the derivation group, C. PICADAR for PCD+ in the validation group and D.

PICADAR for PCD- in the validation group.

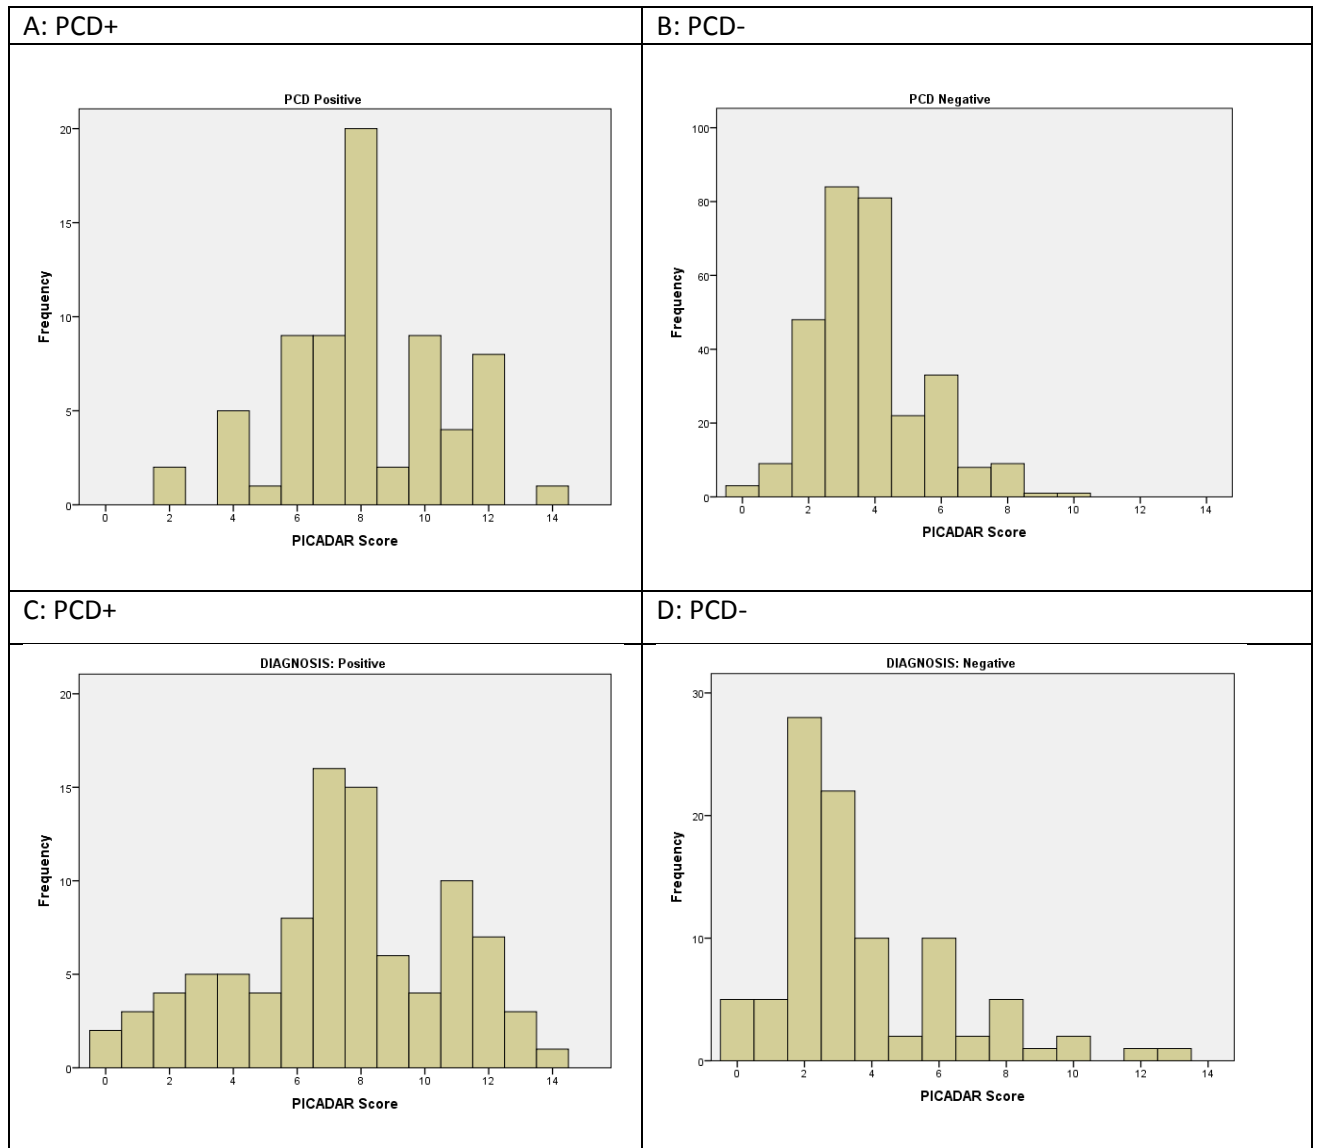

Figure E2: PICADAR+S: receiver operating characteristics for the best prediction model (AUC= 0.94; CI 0.90-0.97) and the predication tool (AUC=0.94; CI 0.90-0.97) in the derivation group. PICADAR+S can be used by individuals with one or more siblings.

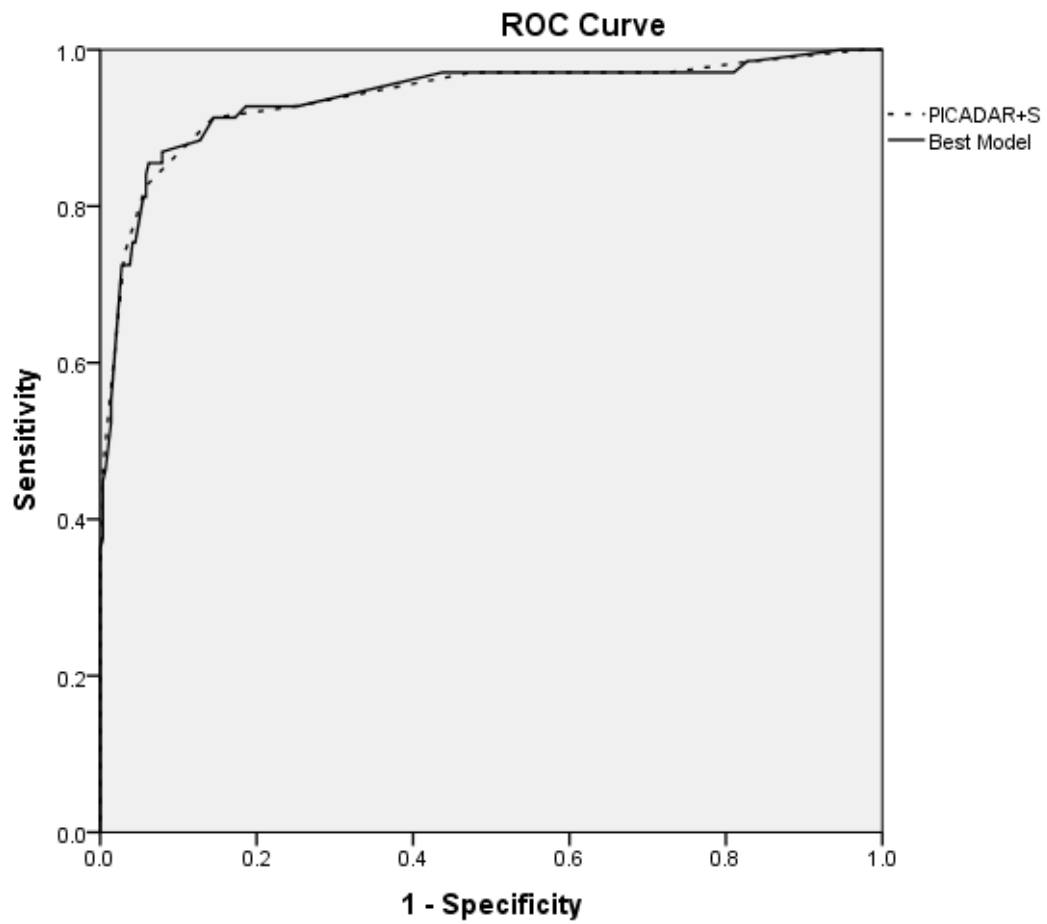

Figure E3: PICADAR score: a list of 8 simple questions which can be used in any patient with 1 or more siblings and with chronic respiratory symptoms starting in early childhood. The total score is calculated (Figure 3(a)) and the individual probability of having PCD diagnosis can be estimated from Figure 3(b).

Figure 3(a)

| <b>PICADAR+S</b>                                                                                                                                                        |                                                                            |   |
|-------------------------------------------------------------------------------------------------------------------------------------------------------------------------|----------------------------------------------------------------------------|---|
| Does the patient have a daily wet cough that started in early childhood?                                                                                                | No- STOP. PICADAR-S is not designed for patients without a wet cough       |   |
| Does the patient have a brother or sister?                                                                                                                              | No-STOP and complete PICADAR. PICADAR-S is only for patients with siblings |   |
|                                                                                                                                                                         |                                                                            |   |
| 1. Does the patient have a sibling diagnosed already with PCD                                                                                                           | Yes                                                                        | 5 |
| 2. Was the patient born preterm or full term?                                                                                                                           | Term                                                                       | 2 |
| 3. Did the patient experience chest symptoms in the neonatal period (eg. tachypnoea, wet cough, pneumonia)?                                                             | Yes                                                                        | 2 |
| 4. Was the patient admitted to a neonatal unit?                                                                                                                         | Yes                                                                        | 2 |
| 5. Does the patient a situs abnormality (situs inversus or heterotaxy)?                                                                                                 | Yes                                                                        | 4 |
| 6. Does the patient have a congenital heart defect?                                                                                                                     | Yes                                                                        | 2 |
| 7. Does the patient experience persistent perennial rhinitis (>3 months)                                                                                                | Yes                                                                        | 2 |
| 8. Does the patient experience chronic ear and hearing symptoms (glue ear, serous otis media, hearing loss, ear perforation, past history of ear surgery i.e. grommets) | Yes                                                                        | 1 |
| <b>Total Score =</b>                                                                                                                                                    |                                                                            |   |

Figure 3(b)

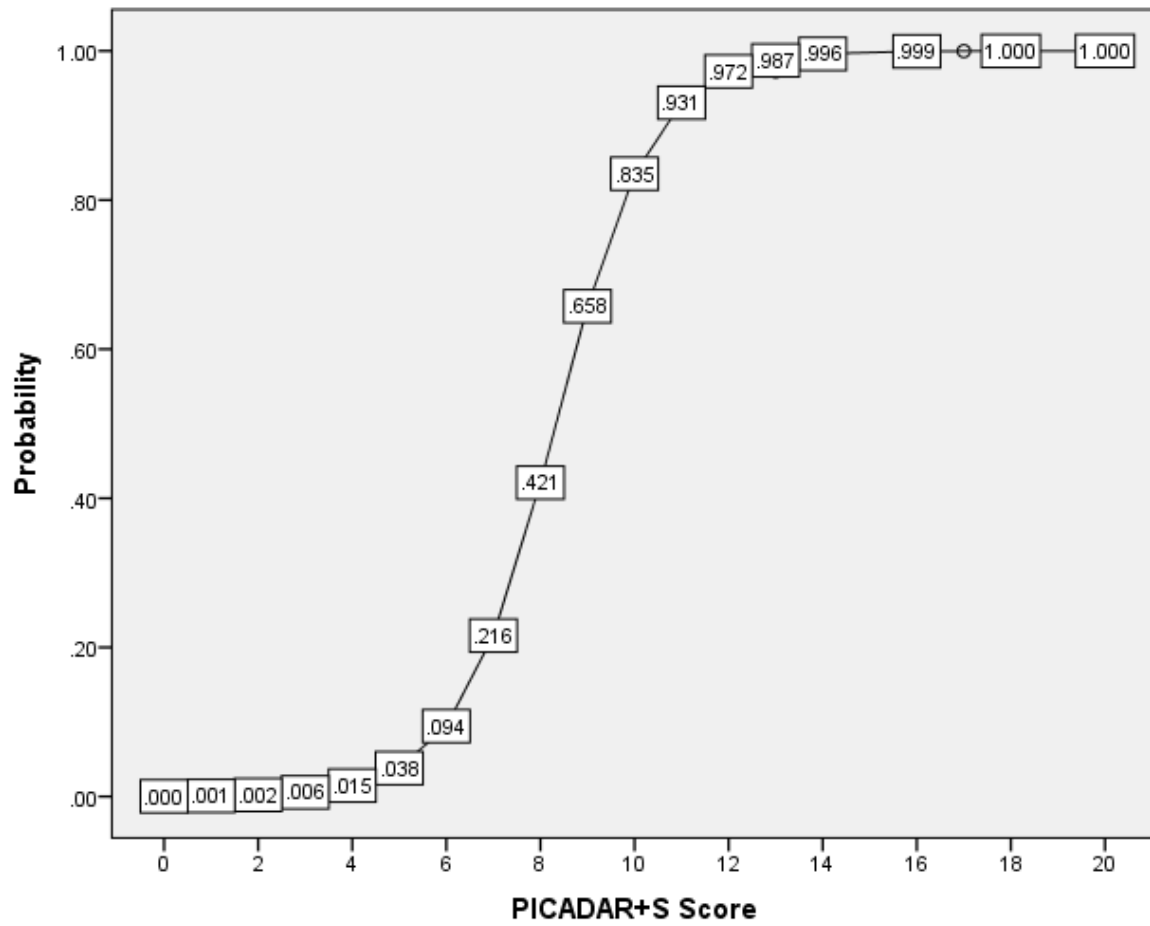

Figure E4: Receiver operating characteristics predictive tool PICADAR+S (AUC 0.93; CI, 0.88-0.97) in the validation group.

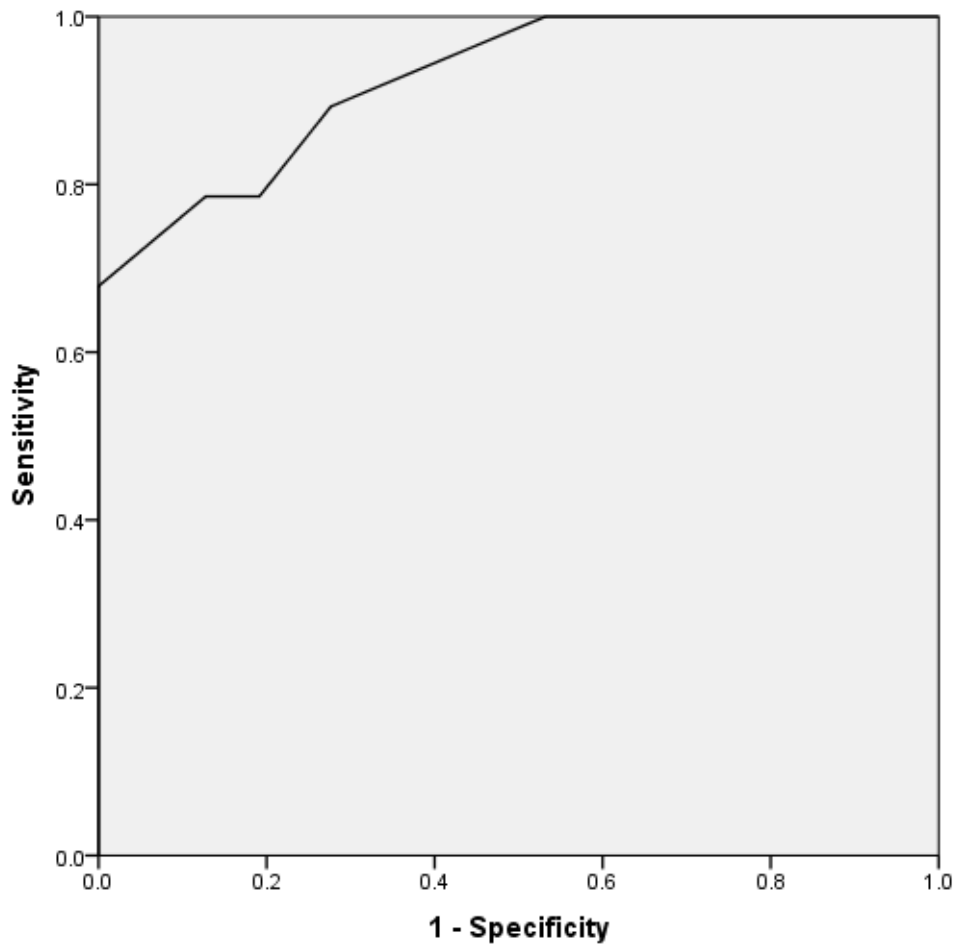

## Supplementary tables

Table E1: Clinical characteristics of the validation group (n=187) comparing PCD positive (n=93) and negative (n=94) groups.

|                                       | <b>Total<br/>n= 187 (%)</b> | <b>PCD positive<br/>n=93 (%)</b> | <b>PCD negative<br/>n =94 (%)</b> | <b>Odds ratio</b> | <b>p-value</b> |
|---------------------------------------|-----------------------------|----------------------------------|-----------------------------------|-------------------|----------------|
| <b>Neonatal symptoms</b>              |                             |                                  |                                   |                   |                |
| Neonatal respiratory support          | 55 (31.8%)                  | 41 (48.8%)                       | 14 (15.7%)                        | 5.1 (2.5-10.4)    | P<0.001        |
| Neonatal chest symptoms               | 79 (44.9%)                  | 63 (72.4%)                       | 16 (18%)                          | 11.9 (5.8-24.5)   | P<0.001        |
| Neonatal Rhinitis                     | 57 (32.8%)                  | 49 (57.6%)                       | 8 (9%)                            | 13.8 (5.9-32.1)   | P<0.001        |
| <b>Chronic symptoms</b>               |                             |                                  |                                   |                   |                |
| Chronic wet cough                     | 161 (87.5%)                 | 91 (98.9%)                       | 70 (76.1%)                        | 28.6 (3.8-217.3)  | P<0.001        |
| Chronic rhinitis                      | 116 (63.4%)                 | 79 (85.9%)                       | 37 (40.7%)                        | 8.8 (4.3-18.2)    | P<0.001        |
| Chronic sinusitis                     | 16 (8.9%)                   | 14 (15.7)                        | 2 (2.2%)                          | 0.1 (0.0-0.6)     | P=0.006        |
| Hearing loss                          | 48 (26.8%)                  | 40 (44.4%)                       | 8 (9%)                            | 8.1 (3.5-18.7)    | P<0.001        |
| Chronic acute otitis media            | 35 (20.2%)                  | 27 (32.1%)                       | 8 (9%)                            | 0.2 (0.1-0.5)     | P<0.001        |
| Chronic glue ear                      | 58 (31.1%)                  | 47 (54.7%)                       | 11 (12.4%)                        | 0.1 (0.1-0.3)     | P<0.001        |
| Ear surgery                           | 30 (16.1%)                  | 23 (26.1%)                       | 7 (7.9%)                          | 0.2 (0.1-0.6)     | P=0.002        |
| <b>Other clinical characteristics</b> |                             |                                  |                                   |                   |                |
| SCBU                                  | 75 (42.4%)                  | 55 (63.2%)                       | 20 (22.2%)                        | 6.7 (3.1-11.7)    | P<0.001        |
| Congenital cardiac defect             | 27 (14.8%)                  | 10 (10.9%)                       | 17 (18.7%)                        | 0.5 (0.2-1.2)     | P=0.140        |
| Situs inversus                        | 54 (30%)                    | 41 (45.6%)                       | 13 (14.4%)                        | 4.9 (2.4-10.2)    | P<0.001        |
| <b>Family history of disease</b>      |                             |                                  |                                   |                   |                |
| PCD in sibling(s)                     | 35 (20.8%)                  | 31 (36.5%)                       | 4 (4.8%)                          | 0.5 (0.4-0.7)     | P<0.001        |
| PCD in extended family                | 9 (5.9%)                    | 8 (10.8%)                        | 1 (1.3%)                          | 0.1 (0.0-0.9)     | P<0.001        |
| Family history of asthma              | 34 (22.8%)                  | 16 (22.2%)                       | 18 (23.4%)                        | 1.1 (0.5-2.3)     | P=0.867        |
| Consanguinity                         | 40 (27.8%)                  | 37 (50.7%)                       | 3 (4.2%)                          | 0.0 (0.0-0.1)     | P<0.001        |



Table E2: Important factors for prediction of PCD selected by using logistic regression; sensitivity analysis from the pooled results from 5 multiple imputations.

|                             | RC: Main model | OR (95% CI)            | p-value | *Simplified RC tool |
|-----------------------------|----------------|------------------------|---------|---------------------|
| Situs abnormality           | 3.72           | 41.48 (15.65 – 109.93) | <0.001  | 4                   |
| Gestational age (full term) | 1.90           | 6.73 (2.20 - 20.61)    | 0.012   | 2                   |
| SCBU                        | 1.99           | 7.35 (2.97 - 18.17)    | <0.001  | 2                   |
| Cardiac defect              | 1.84           | 6.31 (1.10 - 36.08)    | 0.038   | 2                   |
| Rhinitis                    | 1.29           | 3.64 (1.42- 9.32)      | 0.017   | 2                   |
| Neonatal chest symptoms     | 1.74           | 5.70 (2.38 – 13.66)    | 0.027   | 2                   |
| Ears and hearing symptoms   | 1.11           | 3.03 (1.36 – 6.75)     | 0.010   | 1                   |

RC, Regression coefficient; OR, Odds ratio

\*Regression coefficient are rounded to the nearest integer

Table E3: The probability a PCD+ diagnosis for each total PICADAR score result

| PICADAR Total Score ≥: | Probability of PCD+ |
|------------------------|---------------------|
| 0                      | 0.12%               |
| 1                      | 0.31%               |
| 2                      | 0.78%               |
| 3                      | 1.95%               |
| 4                      | 4.74%               |
| 5                      | 11.10%              |
| 6                      | 23.88%              |
| 7                      | 44.07%              |
| 8                      | 66.44%              |
| 9                      | 83.26%              |
| 10                     | 92.59%              |
| 11                     | 96.91%              |
| 12                     | 98.75%              |
| 13                     | -                   |
| 14                     | 99.80%              |

Table E4: Factors for prediction of PCD selected by stepwise logistic regression for patients with 1 or more siblings

|                               | RC: Main model | OR (95% CI)            | p-value | *Simplified RC tool |
|-------------------------------|----------------|------------------------|---------|---------------------|
| Family history PCD (siblings) | 5.38           | 218.19 (19.2 - 2470.8) | <0.001  | 5                   |
| Situs inversus                | 3.92           | 50.56 (14.9 – 170.6)   | <0.001  | 4                   |
| Gestational age (full term)   | 2.27           | 9.72 (2.7 - 34.9)      | 0.001   | 2                   |
| SCBU                          | 2.10           | 8.21 (8.9 - 22.6)      | <0.001  | 2                   |
| Cardiac defect                | 1.92           | 6.84 (1.20 - 39.0)     | 0.03    | 2                   |
| Rhinitis                      | 1.69           | 5.44 (1.7- 17.5)       | 0.004   | 2                   |
| Neonatal chest symptoms       | 1.62           | 5.05 (1.8 – 13.7)      | 0.001   | 2                   |
| Ears and hearing symptoms     | 1.21           | 3.37 (1.3 – 8.4)       | 0.010   | 1                   |

RC, Regression coefficient; OR, Odds ratio

\*Regression coefficient of the main model multiplied are rounded to the nearest integer and assessed so clinical accuracy of these individual scores

Table E5. The probability a PCD+ diagnosis for each total PICADAR+S score result

| PICADAR +S Total Score ≥: | Probability of PCD+ |
|---------------------------|---------------------|
| 0                         | 0.00%               |
| 1                         | 0.10%               |
| 2                         | 0.21%               |
| 3                         | 0.60%               |
| 4                         | 1.47%               |
| 5                         | 3.79%               |
| 6                         | 9.44%               |
| 7                         | 21.58%              |
| 8                         | 42.08%              |
| 9                         | 65.75%              |
| 10                        | 83.52%              |
| 11                        | 93.05%              |
| 12                        | 97.25%              |
| 13                        | 98.94%              |
| 14                        | 99.59%              |
| 15                        | -                   |

|    |         |
|----|---------|
| 16 | 99.94%  |
| 17 | 99.97%  |
| 18 | 99.99%  |
| 19 | -       |
| 20 | 100.00% |

Table E6: Performance measure including sensitivity, specificity, positive predictive value (PPV) and negative predictive value (NPV) of the PICADAR+S prediction tool for different cut-off values calculated from the derivation group and validation group

| Cut-off $\geq$ : | Derivative group |             |      |      | Validation group |             |      |      |
|------------------|------------------|-------------|------|------|------------------|-------------|------|------|
|                  | Sensitivity      | Specificity | PPV  | NPV  | Sensitivity      | Specificity | PPV  | NPV  |
| 0                | >0.99            | <0.01       | 0.12 | NA   | >0.99            | <0.01       | 1.0  | NA   |
| 1                | >0.99            | 0.01        | 0.12 | 1.00 | -                | -           | -    | -    |
| 2                | >0.99            | 0.02        | 0.12 | 1.00 | >0.99            | 0.09        | 0.52 | 1.0  |
| 3                | 0.99             | 0.17        | 0.13 | 0.99 | -                | -           | -    | -    |
| 4                | 0.97             | 0.27        | 0.15 | 0.99 | 0.97             | 0.40        | 0.62 | 0.93 |
| 5                | 0.97             | 0.52        | 0.21 | 0.99 | 0.90             | 0.70        | 0.75 | 0.88 |
| 6                | 0.93             | 0.75        | 0.34 | 0.99 | 0.88             | 0.82        | 0.83 | 0.87 |
| 7                | 0.91             | 0.86        | 0.47 | 0.99 | 0.79             | 0.85        | 0.84 | 0.80 |
| 8                | 0.83             | 0.94        | 0.65 | 0.98 | 0.76             | 0.96        | 0.95 | 0.80 |
| 9                | 0.74             | 0.97        | 0.77 | 0.96 | 0.60             | 0.96        | 0.94 | 0.71 |
| 10               | 0.46             | >0.99       | 1.00 | 0.93 | 0.58             | 0.99        | 0.98 | 0.70 |
| 11               | 0.42             | >0.99       | 1.00 | 0.93 | 0.45             | 0.99        | 0.98 | 0.64 |
| 12               | 0.33             | >0.99       | 1.00 | 0.92 | 0.40             | 0.99        | 0.98 | 0.62 |
| 13               | 0.26             | >0.99       | 1.00 | 0.91 | 0.32             | 0.99        | 0.98 | 0.59 |
| 14               | 0.15             | >0.99       | 1.00 | 0.90 | 0.24             | >0.99       | 1.00 | 0.57 |
| 15               | -                | -           | -    | -    | 0.16             | >0.99       | 1.00 | 0.54 |
| 16               | 0.10             | >0.99       | 1.00 | 0.89 | 0.09             | >0.99       | 1.00 | 0.52 |
| 17               | 0.04             | >0.99       | 1.00 | 0.88 | 0.08             | >0.99       | 1.00 | 0.52 |
| 18               | 0.03             | >0.99       | 1.00 | 0.88 | -                | -           | -    | -    |
| 19               | 0.01             | >0.99       | 1.00 | 0.88 | -                | -           | -    | -    |
| 20               | <0.01            | >0.99       | NA   | 0.88 | -                | -           | -    | -    |

Table E7: The distribution (n (%)) of PCD+ and PCD- scores using PICADAR+S in the derivation group and in the validation group (only children <18 included).

|                | Derivation group |            |            | Validation group |            |            |            |
|----------------|------------------|------------|------------|------------------|------------|------------|------------|
|                | n=281            |            |            | n=103            |            |            |            |
|                | ≤6               | ≥7≤13      | ≥14        | ≤6               | ≥7≤13      | ≥14        |            |
|                | n (%)            | n (%)      | n (%)      | n (%)            | n (%)      | n (%)      |            |
| <b>PCD+</b>    | 2 (4.0%)         | 22 (44.0%) | 26 (52.0%) | <b>PCD+</b>      | 6 (10.7%)  | 23 (41.1%) | 27 (48.2%) |
| <b>(n=50)</b>  |                  |            |            | <b>(n=56)</b>    |            |            |            |
| <b>PCD-</b>    | 191 (82.7%)      | 39 (16.8%) | 1 (0.4%)   | <b>PCD-</b>      | 34 (72.3%) | 13 (27.7%) | 0 (0.0%)   |
| <b>(n=231)</b> |                  |            |            | <b>(n=47)</b>    |            |            |            |
